# Supplementary material
Source: PubMed Central journal article supplement (PMC2492650)
Supplement: pp.108.118570_1.pdf [file pp.108.118570_1.pdf]

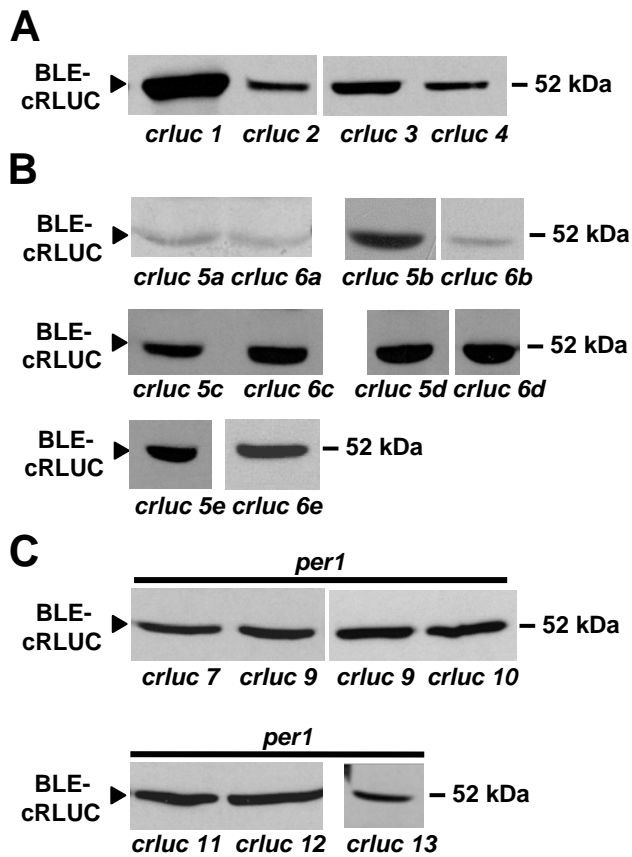

**Supplemental Figure 1.** Immunodetection of the BLE-cRLUC Fusion Protein in Different Transgenic Lines with an Anti-RLUC Antibody Shows its Correct Expression with a Size of 52 kDa. A, Transgenic wild-type lines *crluc 1*, *2*, *3* and *4* were grown at the usual temperature of 23°C and harvested at LD2. Crude extracts were prepared and proteins (30 µg per lane) were separated on a 9% SDS-PAGE along with a molecular mass standard and immunoblotted with anti-RLUC antibodies (see Material and Methods). B, The same procedure as described in (A) was carried out along with transgenic wild-type lines *crluc 5* and *6a*, *b*, *c*, *d* and *e*. In case of *crluc 5* and *6a*, 150 µg proteins per lane were loaded and for all other strains, 30 µg proteins per lane were loaded. C, The same procedure as described in (A) was carried out along with transgenic *per1* lines *crluc 7*, *8*, *9*, *10*, *11*, *12* and *13*. In case of *crluc 13*, 30 µg proteins per lane were loaded, and for all other strains 15 µg proteins per lane were loaded.
