# Supplementary material
Source: PubMed Central journal article supplement (PMC2492650)
Supplement: pp.108.118570_2.pdf [file pp.108.118570_2.pdf]

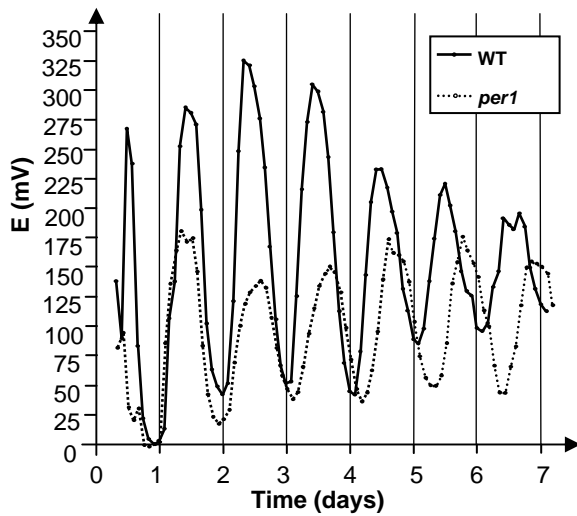

**Supplemental Figure 2.** The *per1* Mutant Has a Lengthened Period in Comparison to Wild-Type Strain 137C. Phototaxis measurements were carried out with the wild-type strain 137C (WT) that was used for mutagenesis (Bruce, 1972) as well as with the *per1* mutant (*per1*) along with an automated measuring unit (see Material and Methods). E represents the extinction in mV. Time (days) indicates how long cells were exposed to constant darkness. 137C had a circadian rhythm of phototaxis with an average period of 24.9 h (n = 6; SEM: 0.2), while the *per1* mutant had an average period of 26.9 h (n = 10; SEM: 0.1).
